# Supplementary material for: Ternary Metal-Alginate-Chitosan Composites for Controlled Uptake of Methyl Orange
Source: MDPI journal article supplement (doi:10.3390/surfaces5040031), 2022-09-24
Supplement: s1 [file s1]

## Supplementary Materials:

# Ternary Metal-Alginate-Chitosan Composites for Controlled Uptake of Methyl Orange

Bernd G. K. Steiger and Lee. D. Wilson \*

Department of Chemistry, University of Saskatchewan, 110 Science Place, Thorvaldson Building, Saskatoon, SK S7N 5C9, Canada

\* Correspondence: lee.wilson@usask.ca; Tel.: +1-306-966-2961

### Material Synthesis

Controlling the pH conditions during the neutralization step appeared to be crucial for the composite formation. The formation of metal oxides and their subsequent precipitation should be avoided.

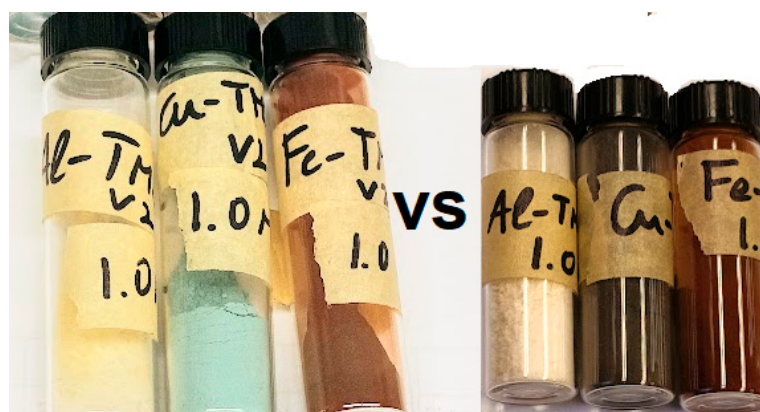

**Figure S1.** Visual difference between the prepared materials with careful (left) neutralization step for successful materials preparation vs. metal oxide precipitation and lack of metal incorporation into the framework (right).

### Adsorption Experiments

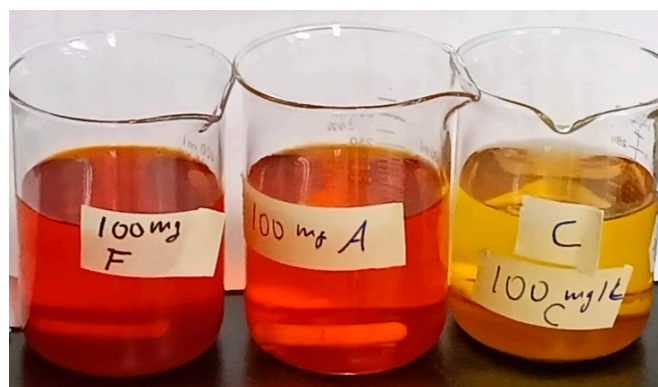

**Figure S2.** After the kinetics study ( $C_0$  ca. 230 mg/L), where 100 mg material were submerged in 250 mL solution. No filter was used to get the optimum performance; withdrawal of material was negligible.

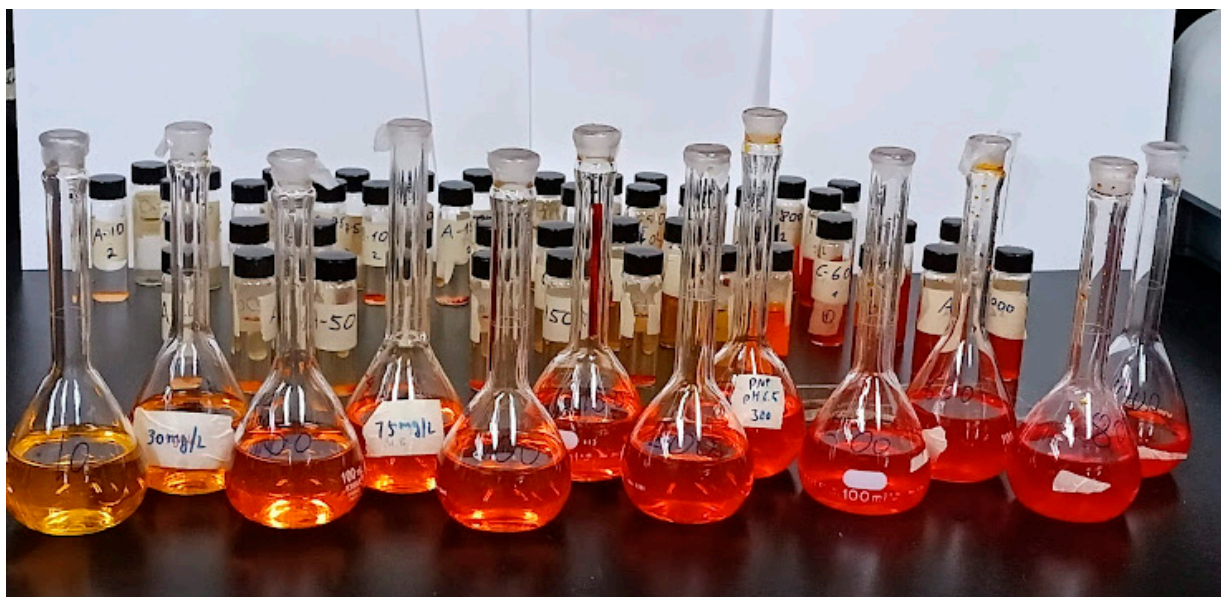

**Figure S3.** Adsorption isotherm studies with methyl orange. Starting solutions in the foreground while Al-TMC-N and Cu-TMC-N (Fe-TMC-N not shown for clarity and lack in visual difference) are after adsorption. Solutions from 10-1000 mg/L were tested.

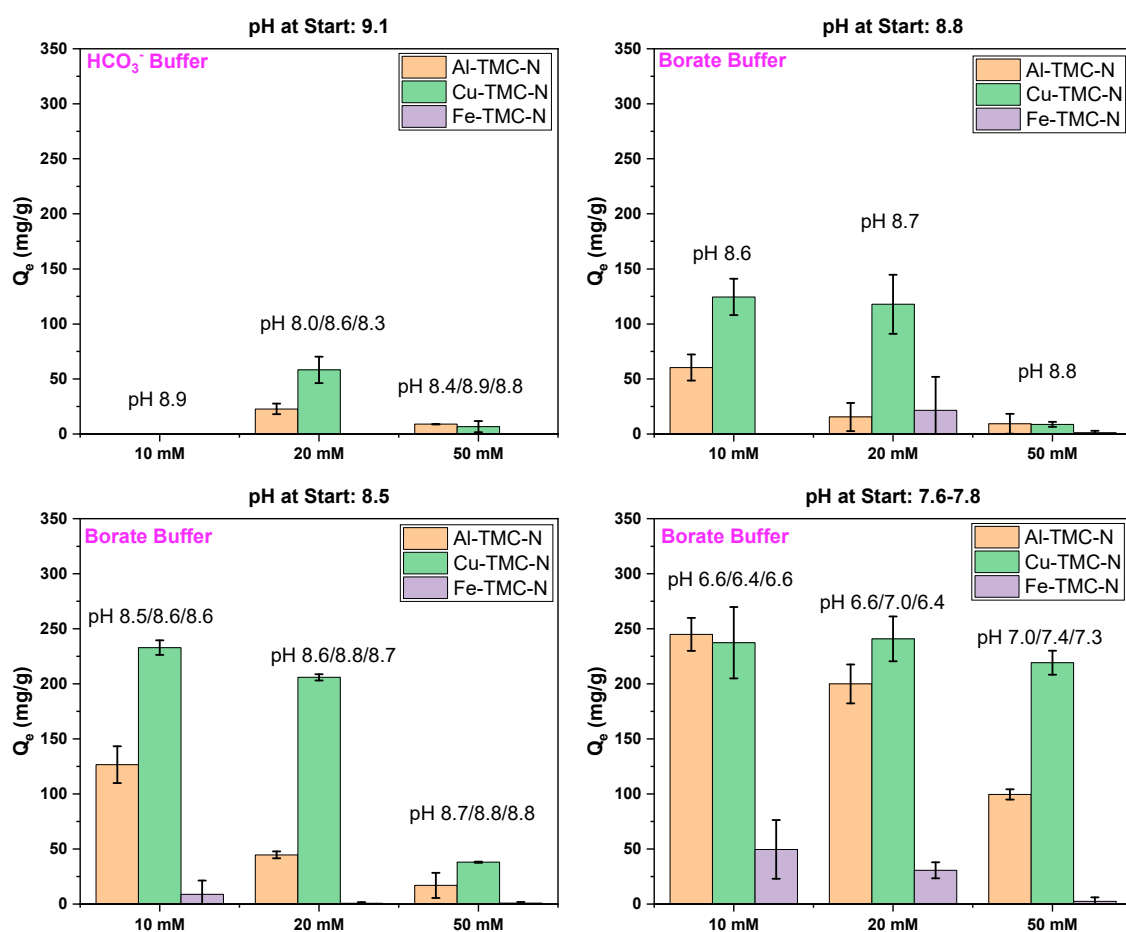

**Figure S4.** Adsorption of MO in borate buffer solutions of varying strength (10-50 mM) and carbonate buffer (10-50 mM) with determined pH before adsorption and after adsorption (see inset in each graph).

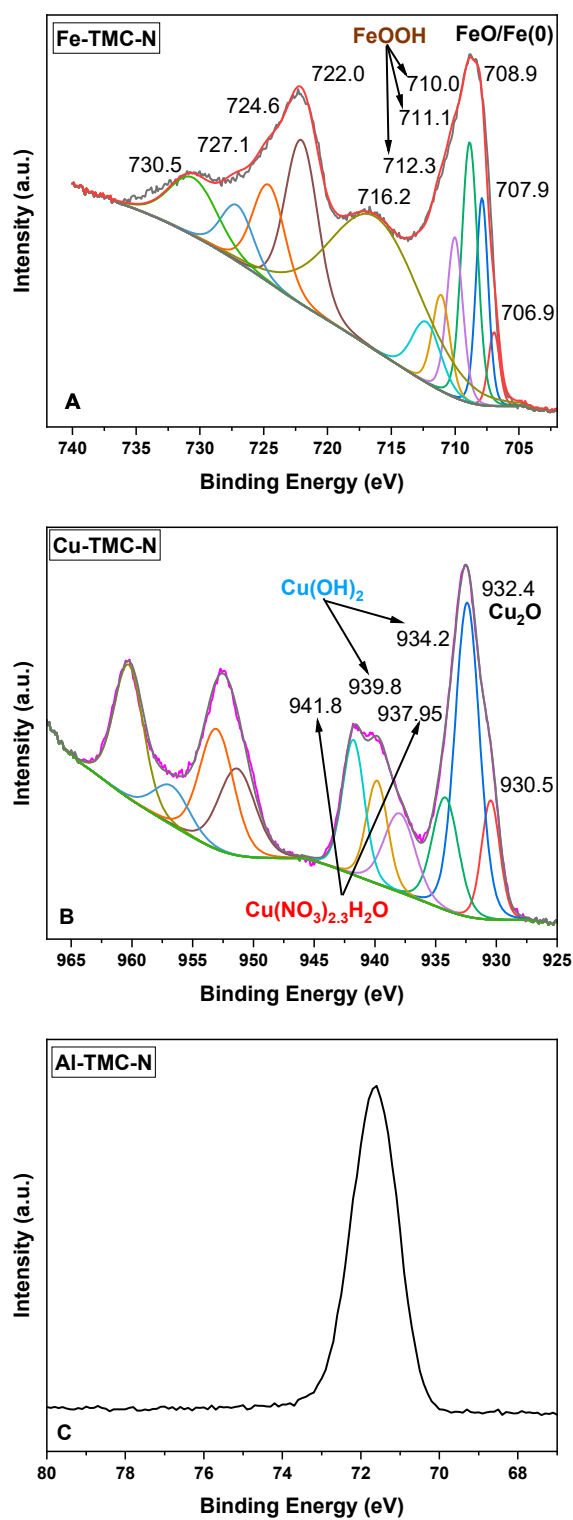

Figure S5. XPS narrow scan of Fe 2p<sub>3/2</sub> (A), Cu 2p<sub>3/2</sub> (B) and Al 2p<sub>3/2</sub> (C).

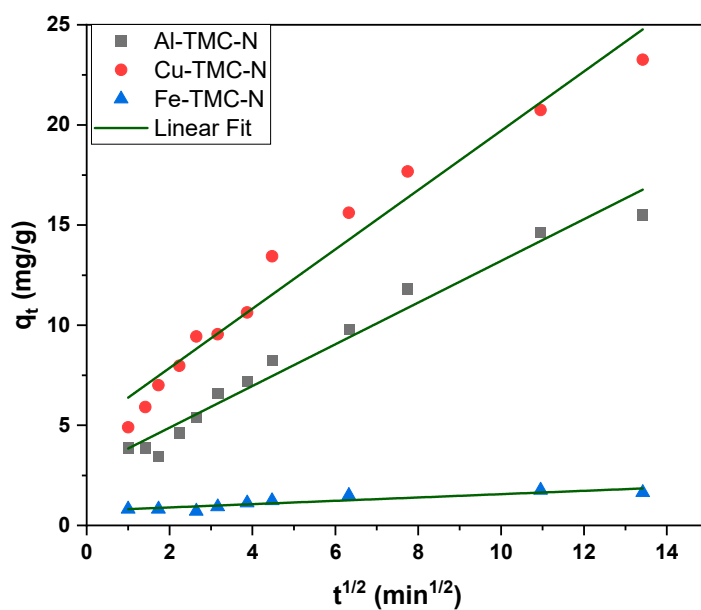

Figure S6. Single linear fit and intraparticle diffusion model of the three TMC materials.

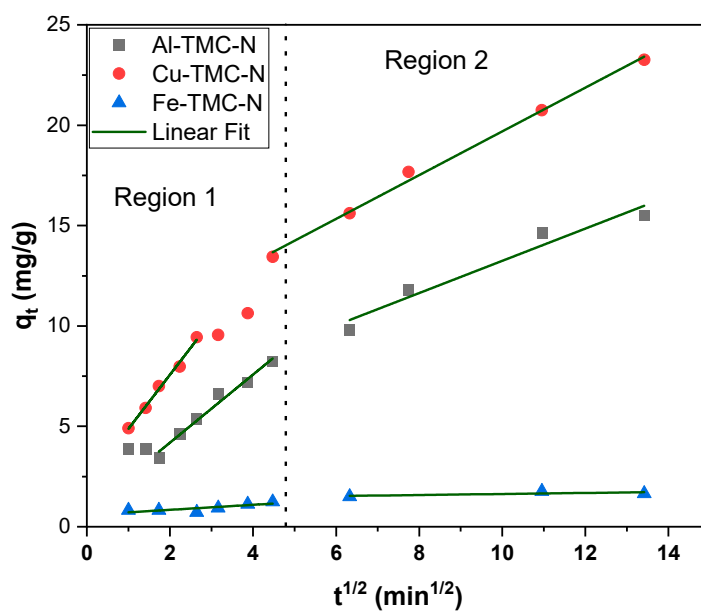

Figure S7. Linear Fit of two regions and intraparticle diffusion model of all three TMC materials.

**Table S1.** Intraparticle diffusion model according to Weber and Morris for all three materials and MO adsorption kinetics.

|          | One single Fit |             |                | Region 1  |             |                | Region 2  |             |                |
|----------|----------------|-------------|----------------|-----------|-------------|----------------|-----------|-------------|----------------|
|          | C              | k           | R <sup>2</sup> | C         | k           | R <sup>2</sup> | C         | k           | R <sup>2</sup> |
| Al-TMC-N | 2.8 ± 0.4      | 1.04 ± 0.06 | 0.97           | 0.8 ± 0.4 | 1.7 ± 0.1   | 0.98           | 5.2 ± 1.3 | 0.8 ± 0.1   | 0.95           |
| Cu-TMC-N | 4.9 ± 0.6      | 1.48 ± 0.09 | 0.97           | 2.2 ± 0.3 | 2.7 ± 0.4   | 0.99           | 8.8 ± 0.4 | 1.09 ± 0.04 | 0.99           |
| Fe-TMC-N | 0.73 ± 0.09    | 0.08 ± 0.01 | 0.83           | 0.6 ± 0.1 | 0.12 ± 0.04 | 0.66           | 1.4 ± 0.3 | 0.03 ± 0.03 | 0.50           |

**Table S2.** Freundlich isotherm parameters for all three TMC materials.

|                | Al-TMC-N  | Cu-TMC-N  | Fe-TMC-N  |
|----------------|-----------|-----------|-----------|
| K <sub>f</sub> | 63 ± 16   | 60 ± 18   | 13 ± 1    |
| n              | 3.0 ± 0.4 | 2.8 ± 0.4 | 4.4 ± 0.4 |
| R <sup>2</sup> | 0.75      | 0.75      | 0.95      |

**Table S3.** Sips isotherm parameters for all three TMC materials.

|                | Al-TMC-N    | Cu-TMC-N  | Fe-TMC-N    |
|----------------|-------------|-----------|-------------|
| q (mg/g)       | 410 ± 14    | 452 ± 86  | 41.6 ± 0.9  |
| n              | 1.5 ± 0.1   | 1.2 ± 0.4 | 1.4 ± 0.4   |
| K <sub>a</sub> | 0.71 ± 0.06 | 2.1 ± 1.6 | 0.20 ± 0.02 |
| R <sup>2</sup> | 0.99        | 0.89      | 0.98        |
